# Supplementary material for: Effective Removal of Acetaldehyde Using Piperazine/Nitric Acid Co-Impregnated Bead-Type Activated Carbon
Source: MDPI journal article supplement (doi:10.3390/membranes13060595), 2023-06-12
Supplement: s1 [file s1]

# **Supplementary Information**

Supplementary Information-1: SEM Morphology of Bare BAC

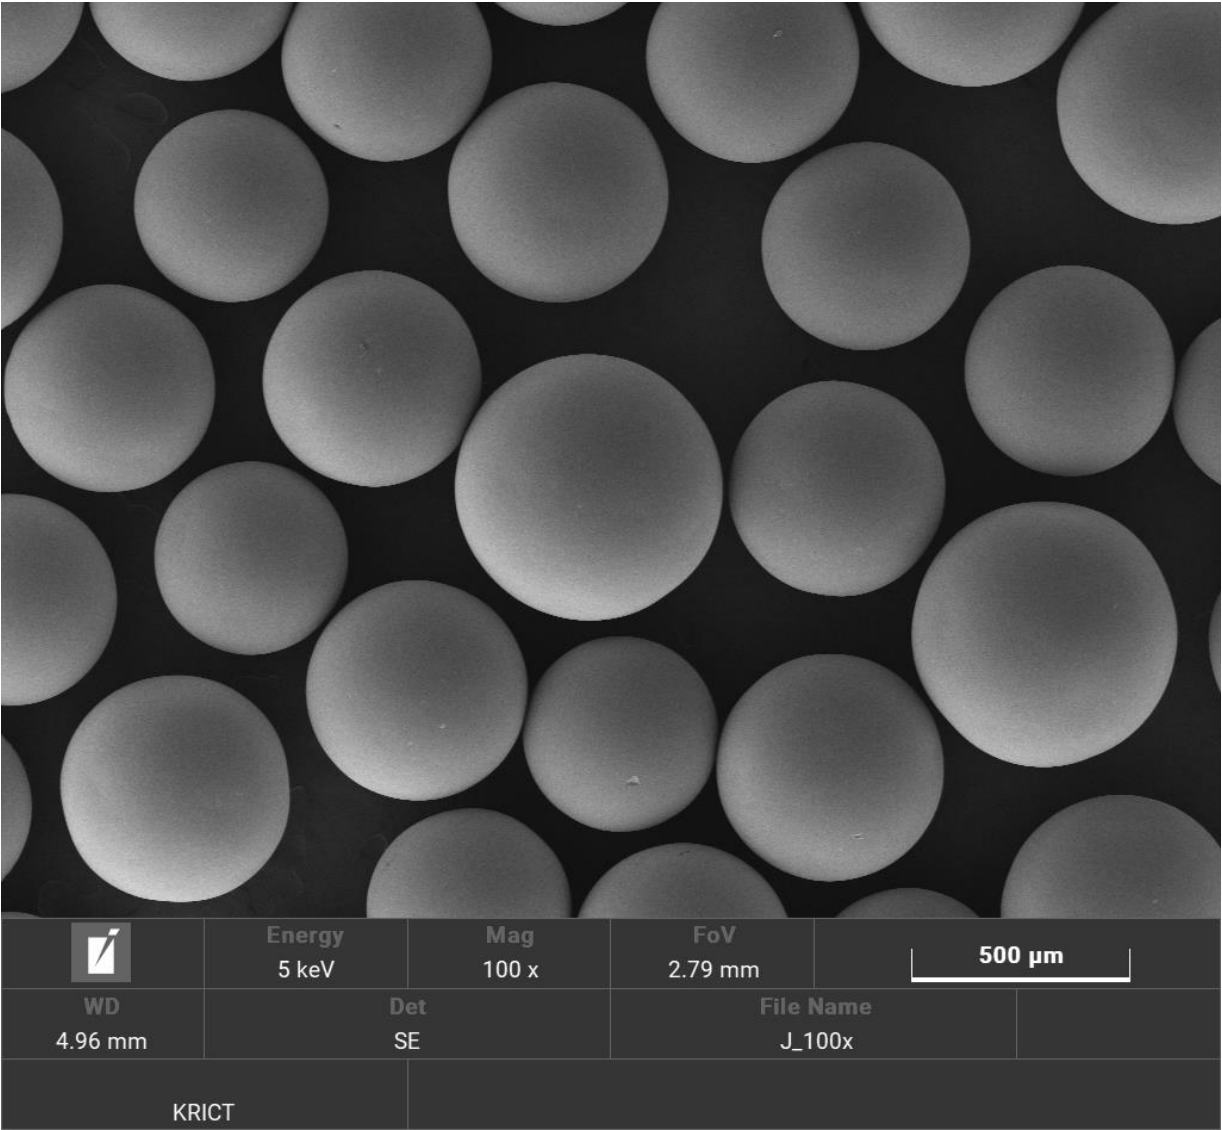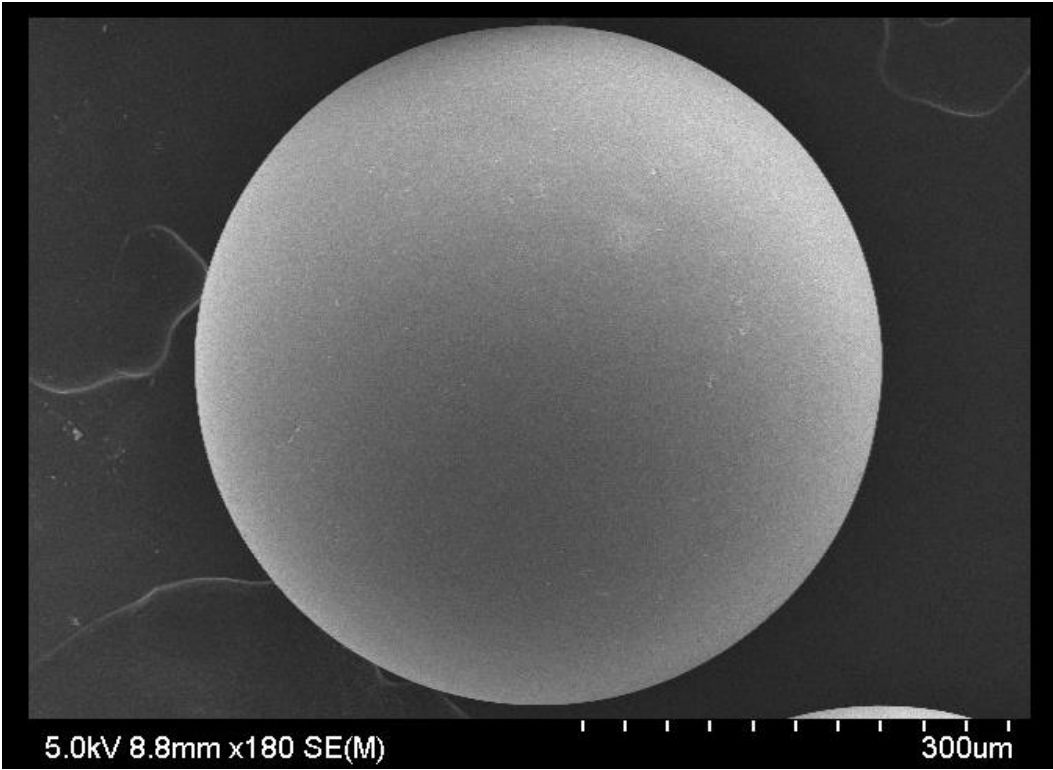

## Supplementary Information-2: TEM Morphology of Bare BAC (After Grinding/Crushing BAC)

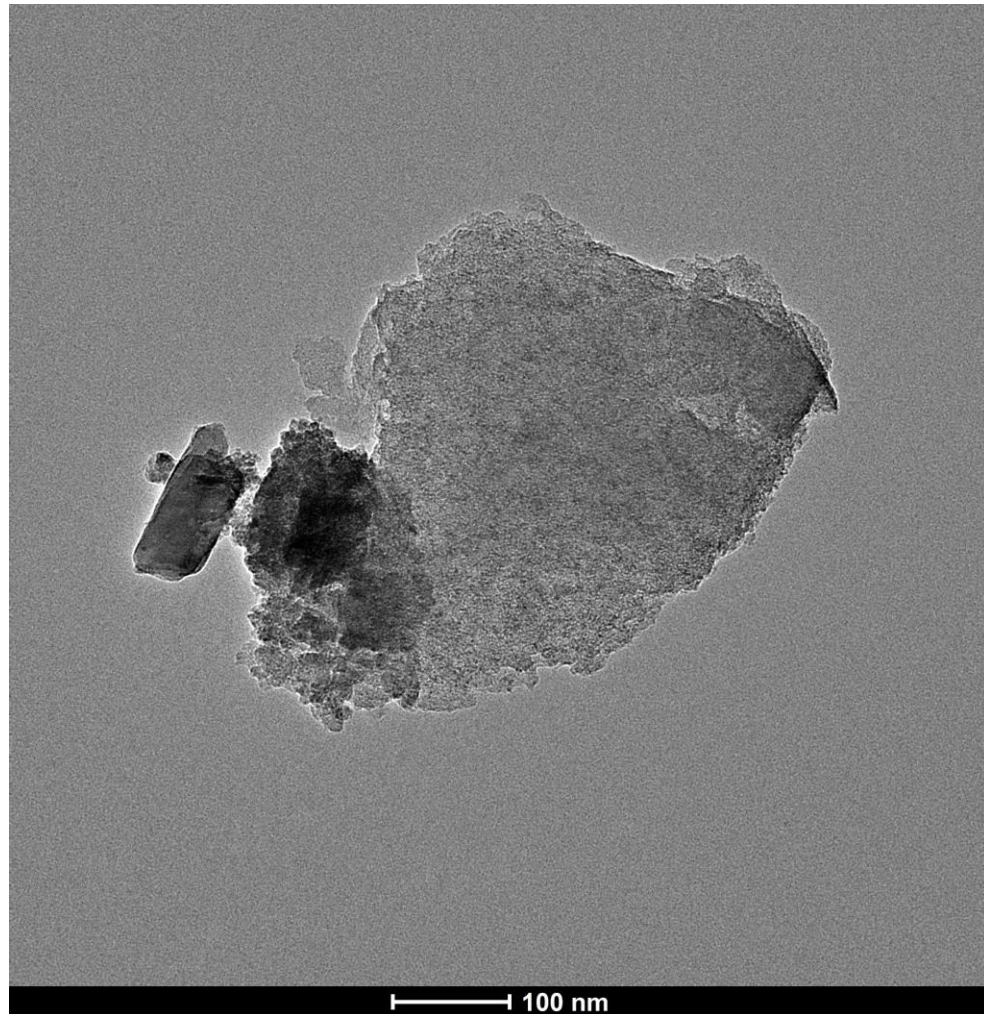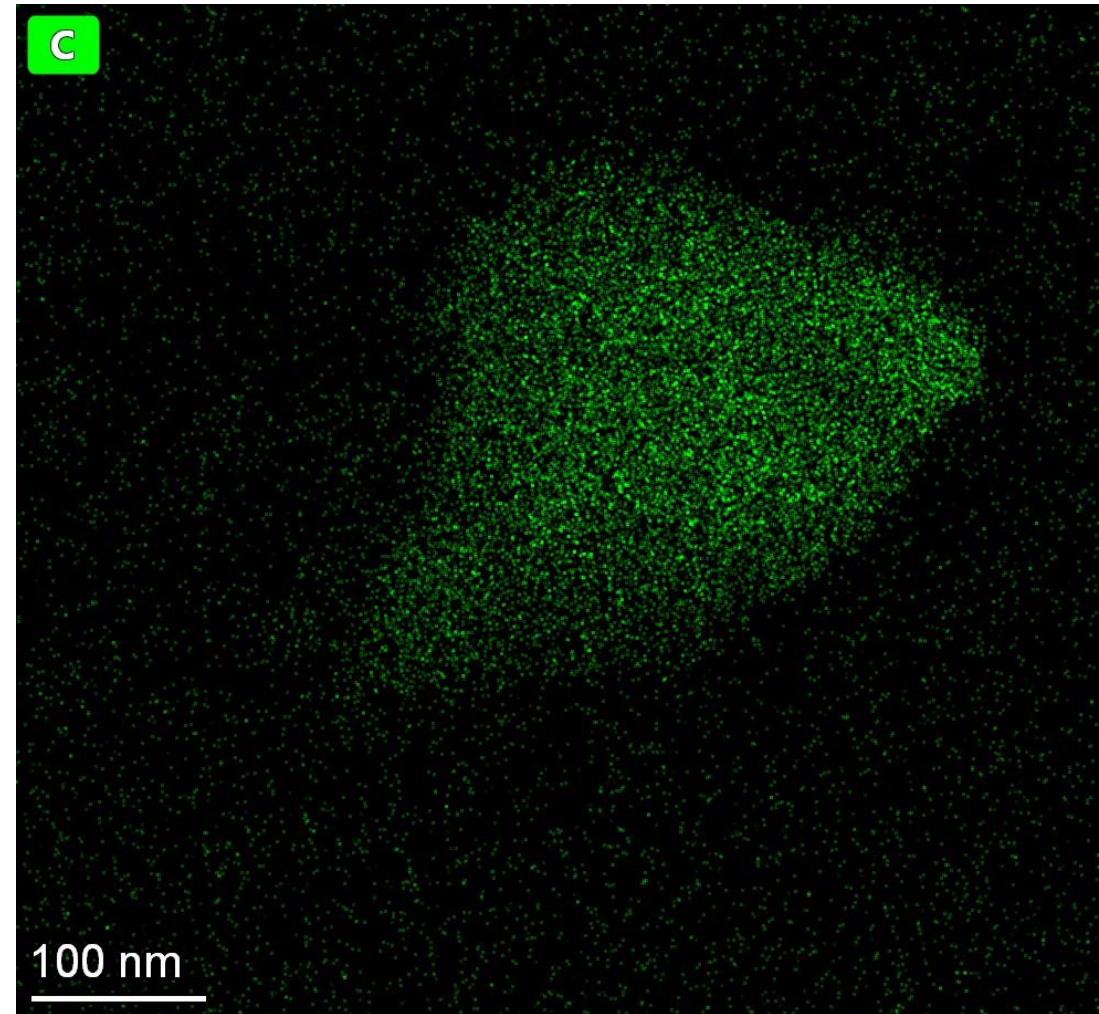



Supplementary Information-3: XRD Patterns of Bare BAC

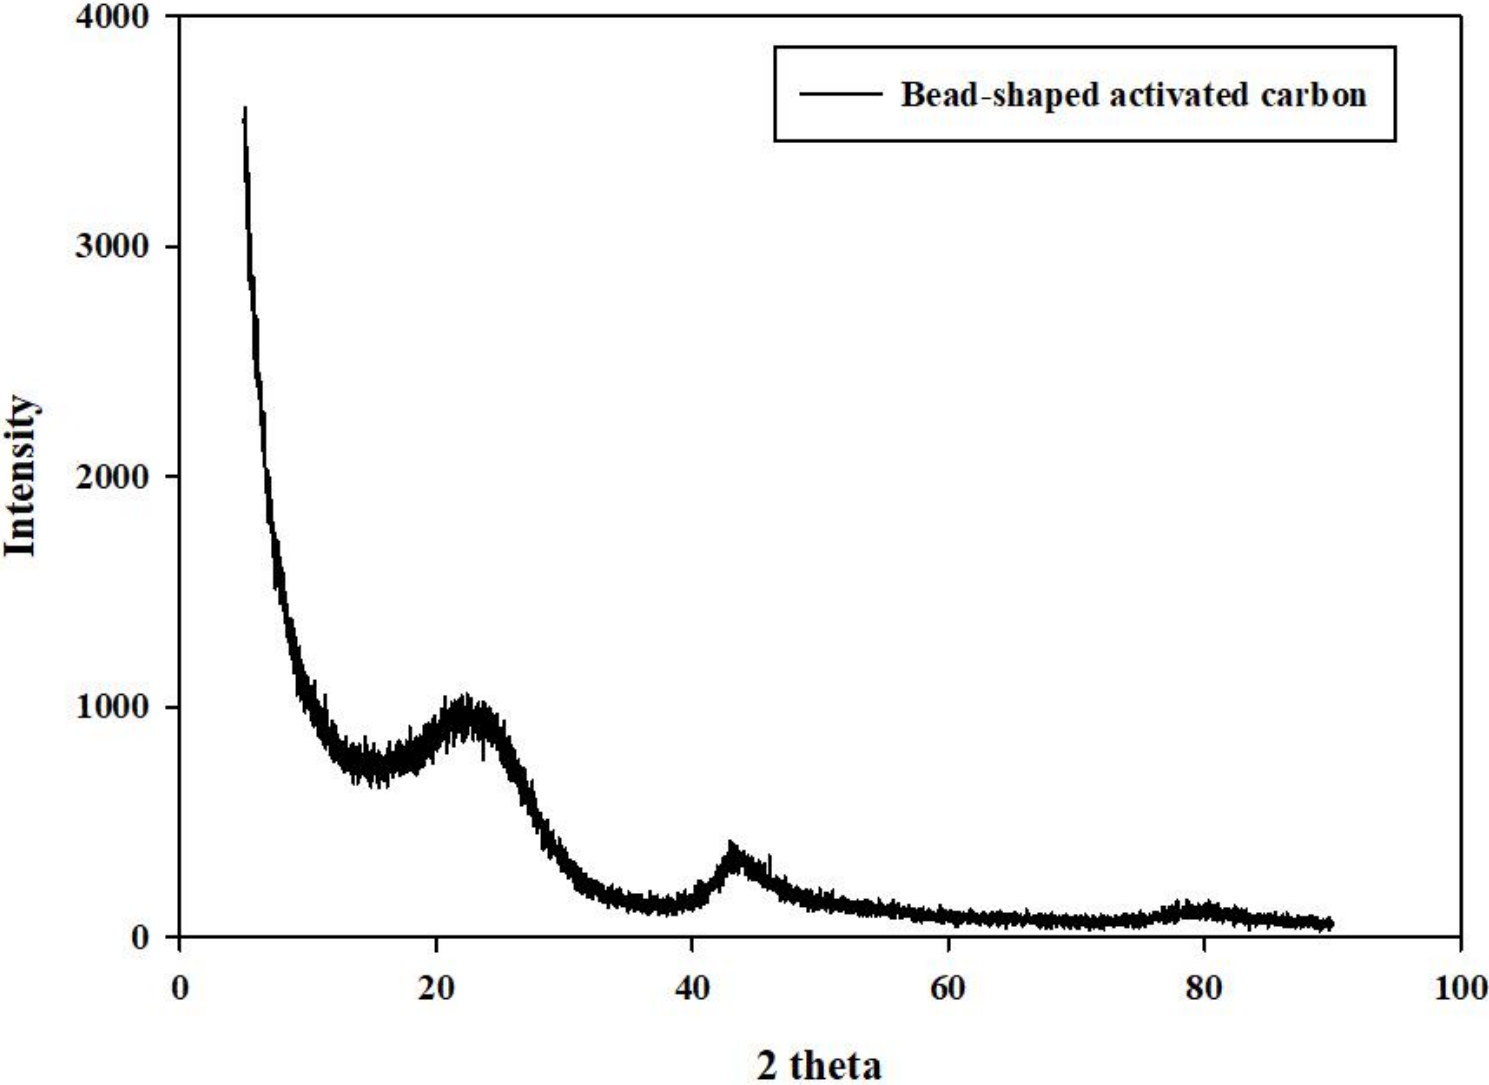

Supplementary Information-4: SEM-EDX of Bare BAC

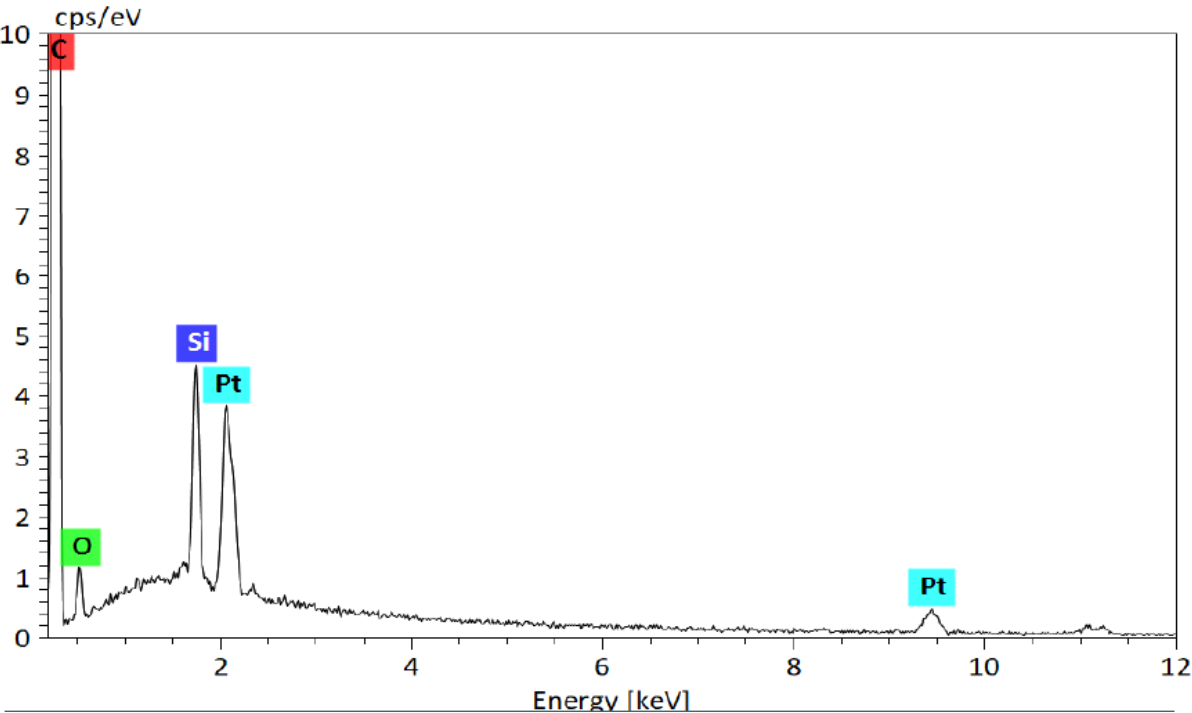

| Element | Mass (%) | Atom (%) |
|---------|----------|----------|
| C       | 94.41    | 96.10    |
| O       | 4.45     | 3.40     |
| Si      | 1.14     | 0.50     |
| Pt      | 0.00     | 0.00     |
|         | 100.00   | 10.00    |

Pt: Coating material during the measurement

Supplementary Information-5: Attrition and Abrasion Test of Bare BAC (Physical Stability)

| sample \ [%] | 1 <sup>st</sup> -time | 2 <sup>nd</sup> -time | Mean Value±Deviations |
|--------------|-----------------------|-----------------------|-----------------------|
| BAC          | 99.65                 | 99.88                 | 99.77±0.11            |

- Method : ASTM D4058–96 & SPENCE method, Attrition and abrasion testers
- Conditions
  - Wight of test BAC : 100g
  - Duration of the test : 30min
  - Rotating speed : 54rpm
  - Sieve : 250um

Supplementary Information-6: Acetaldehyde Cycle Test over Bare BAC

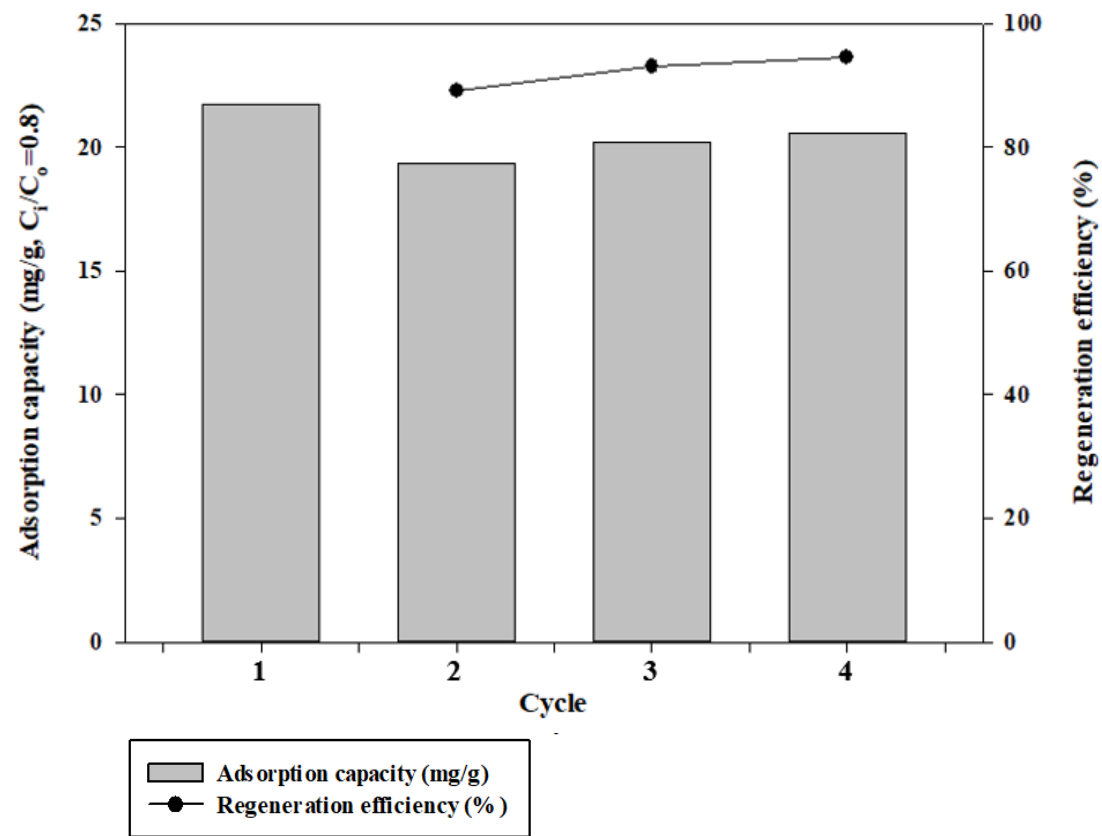

| Cycle     | Adsorption capacity (mg/g, $C_i/C_o=0.8$ ) | Regeneration efficiency (%) |
|-----------|--------------------------------------------|-----------------------------|
| 1 (Fresh) | 21.73                                      | -                           |
| 2         | 19.36                                      | 89.09                       |
| 3         | 20.21                                      | 93.01                       |
| 4         | 20.55                                      | 94.57                       |

Acetaldehyde 200 ppm, GHSV 37,500 hr<sup>-1</sup>, 25°C, 1.255 L/min, adsorbent 2 ml

Supplementary Information-7: Particle Size Distribution of Bare BAC

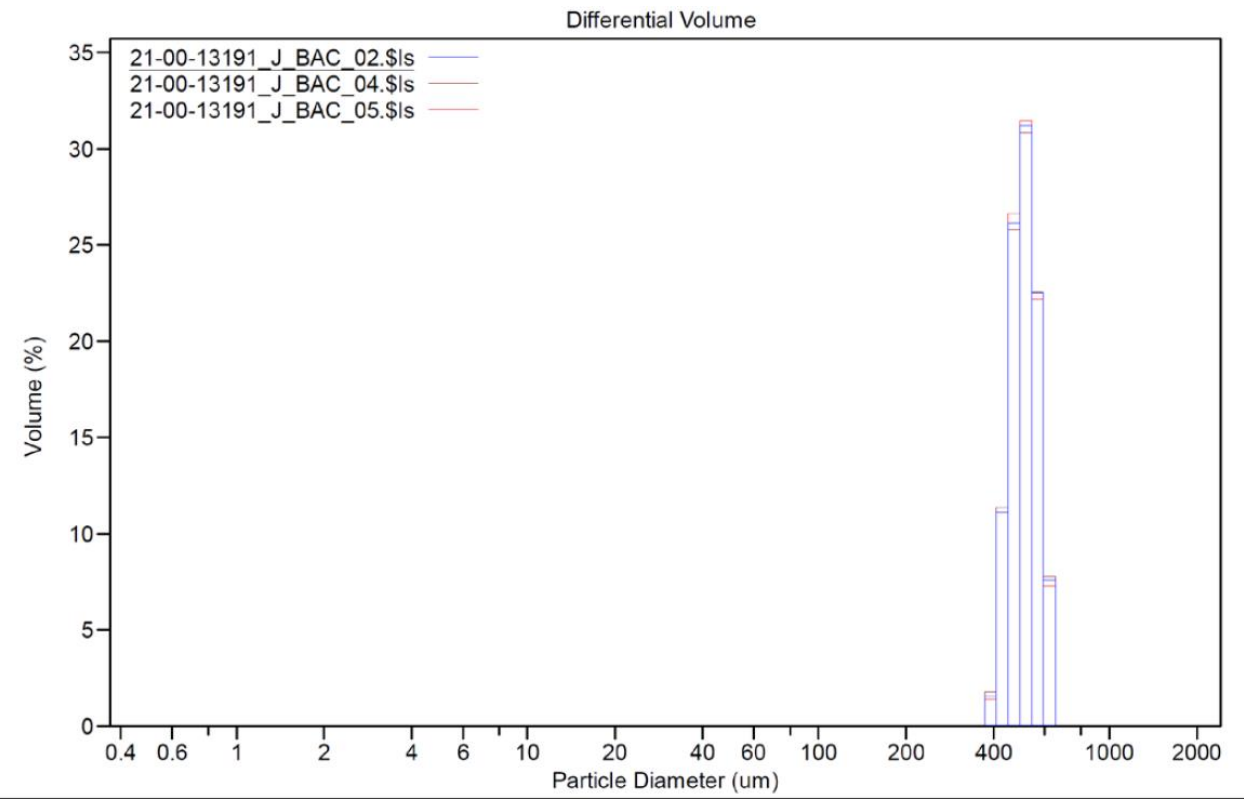

| Run     | Particle size (μm) |                 |                 |         |
|---------|--------------------|-----------------|-----------------|---------|
|         | Diameter at 10%    | Diameter at 50% | Diameter at 90% | Average |
| 1       | 440.2              | 511.0           | 589.2           | 512.9   |
| 2       | 438.7              | 511.0           | 589.6           | 512.7   |
| 3       | 440.6              | 510.3           | 588.3           | 512.3   |
| SD      | 1.00               | 0.40            | 0.67            | 0.31    |
| CV (%)  | 0.23               | 0.08            | 0.11            | 0.006   |
| Average | 439.8              | 510.8           | 589.0           | 512.6   |



Supplementary Information-8: CH<sub>3</sub>CHO adsorption parameters on coconut shell and coal based activated carbon samples

| Sample                         | C <sub>in</sub> | W <sub>ad</sub> |
|--------------------------------|-----------------|-----------------|
|                                | [ppm]           | [mg/g]          |
| Coconut shell activated carbon | 200             | 20.87           |
| Coconut-P7N1-900               | 200             | 53.46           |
| Coal based activated carbon    | 200             | 16.81           |
| Coal-P7N1-900                  | 200             | 23.43           |
